# Supplementary material for: Zebrafish aggression on the sub-second time scale: evidence for mutual motor coordination and multi-functional attack manoeuvres
Source: PubMed Central journal article supplement (PMC6124137; doi:10.1098/rsos.180679), 2018-08-15
Supplement: rsos180679supp1.pdf [file rsos180679supp1.pdf]

29 (such a trade-off may be rational if attacks are particularly damaging to the  
 30 opponent). Thus, depending on the values of  $\alpha_1, \alpha_2, q_1$  may have a positive  
 31 or negative effect on fight times.

32 The case of  $\alpha_3$  is easier to analyze. A higher quality opponent should  
 33 result in more damage elicited with each attack or a greater attack rate.  $\alpha_3$   
 34 should therefore be positive and  $q_2$  should be negatively correlated with fights  
 35 times, which is the case we observe in our data. As one final point, we note  
 36 that if  $\alpha_3 = 0$ , then we are left with only the quality/RHP of the loser as the  
 37 determinant of the fight duration. The specific case is important, because  
 38 a dependence of fight times on only the RHP of the loser is widely taken  
 39 to be an indicator of the WOA model. Our analysis thus points to further  
 40 ambiguities that occur when one tries to determine assessment models solely  
 41 based on analysis of RHP and fight time covariation. It also further motivates  
 42 the utility of our new technique in circumventing these ambiguities by testing  
 43 the underlying assumptions of the different assessment models directly.

#### 44 1.1.1 Tabular summary of assessment models

| 45 Assessment model | Cost structure                                   | Fight time scaling                                                | Escalation                           |
|---------------------|--------------------------------------------------|-------------------------------------------------------------------|--------------------------------------|
| WOA                 | Signaler pays cost of producing signal           | Loser body mass increases fight time, winner body mass irrelevant | Escalation is allowed within a phase |
| 46 SA               | Signaler and receiver can both bare direct costs | Loser body mass increases, winner body mass decreases fight times | Escalation only between phases       |
| CA                  | Signaler and receiver can both bare direct costs | Diverse outcomes possible                                         | Escalation is allowed within a phase |

## 47 1.2 Supplementary methods

### 48 1.2.1 Measurement and analysis of color changes

49 The easiest way to estimate color changes is to calculate the average intensity  
 50 of each fish identified fish whose silhouette has been separated from the back-  
 51 ground by thresholding the image intensity. However, this approach brings  
 52 with it certain biases, because the arena is not uniformly illuminated. The  
 53 area near the walls in particular tends to have a stronger shadow than the

54 central arena. Since fighting fish distribute themselves near the walls during  
55 the asymmetric phase and near the center during the symmetric phase, use  
56 of the raw intensity risks confounding the effects of location and intrinsic  
57 intensity change.

58 In order to remove the bias, we used linear regression to dissociate the  
59 effects of time and space on fish intensity. The rectangular arena was divided  
60 into a 6-by-6 grid and each grid rectangle was associated with a regression  
61 coefficient. Time likewise was partitioned into 2 minute long segments and  
62 each segment associated with a regression coefficient. For each fight and each  
63 fish, we carried out a separate linear regression between the fish intensity,  
64 the location and time. We used the regression coefficients associated with  
65 time as indicators of the reflectance change of each fish.

66 A linear regression model was used because of the following fact of physics.  
67 Reflected illumination is the product of incident light intensity  $I(x, y)$  which  
68 in the setup depends on position and not on time, and the reflectance of  
69 the fish  $r(t)$ , which evolves over time but not over space. Overall fish in-  
70 tensity  $C$  is given as  $C = I(x, y)r(t)$ . If we assume that the changes in  
71 reflectance and incident light intensity are small, then color change at any  
72 given time and place is well approximated as  $\Delta C(x, y, t) = r_{mean}\Delta I(x, y) +$   
73  $I_{mean}\Delta r(t) + \Delta I(x, y)\Delta r(t) \approx r_{mean}\Delta I(x, y) + I_{mean}\Delta r(t)$ , which is linear in  
74 both reflectance and illumination.

75 As mentioned in the main text, another weak predictor of fight outcome  
76 was color. We found that zebrafish exhibited a transient darkening which  
77 occurred specifically during the symmetrical contest phase (see **Figure S4**).  
78 On average, the symmetric fight phase was accompanied by an  $8\% \pm 4\%$   
79 ( $N = 28$ ) darkening of appearance in both fighters and this transient largely  
80 disappeared irrespective of whether the fight ended with asymmetric chasing  
81 or not. The eventual loser tended to darken more than the winner. In 9  
82 out of 10 fights, the eventual loser had a higher intensity change relative  
83 to pre-fight intensity than the eventual winner ( $p = 0.02$ , 2-tailed binomial  
84 test). However, color change was a weak predictor of how the fight ended,  
85 since unequal changes in color were also associated with fights that ended  
86 without a clear way to determine the winner because chasing behavior was  
87 absent.

### 88 1.2.2 Classifier validation by sociality analysis

89 One potential concern for the use of our classifier is that rather than de-  
90 tecting aggressive behavior specifically, it instead detects social behavior in  
91 general. This may happen because general social behavior such as school-  
92 ing shares many of the same features that attack behavior does, including

93 close inter-individual distance and alignment of the interacting individuals.  
94 We therefore examined how well our classifier tracks the so-called sociality  
95 index (Miller and Gerlai, Beh. Brain Res. 2007, Hinz and Polavieja, PNAS  
96 2017). The sociality index compares the average inter-individual distance  
97 ( $d_a$ ) during some time period with a permuted distance ( $d_p$ ), where the spa-  
98 tial coordinates of the two individuals have been shuffled with respect to time  
99 (i.e. the permuted trajectories represent hypothetical fish that still have the  
100 same place preferences but do not coordinate their movements with each  
101 other). The sociality index is calculated as  $SI = \frac{d_p - d_a}{d_p}$ . The sociality index  
102 is close to 1 when fish are interacting with each other in an attractive fashion,  
103 whereas it is nearly zero when fish do not show social interactions.

104 In **Figure S1** we plot how the sociality index as well as an index of  
105 individual aggression for four different fights evolves over time. During the  
106 pre-conflict period, our fish displayed a variety of different behaviors. In  
107 some fights, the pre-conflict phase was characterized by schooling behavior  
108 (see **Figure S1** first 10 minutes in the two top panels), which is evidenced  
109 by a high sociality index. Note also that the classifier did not confuse this  
110 social behavior with true aggression since attack fractions of both individuals  
111 remained low during the same period and only rose later near the 20 minute  
112 mark. In other sessions, the fish spent parts of the pre-conflict period freezing  
113 or swimming in a non-social fashion (see for example **Figure S1** bottom  
114 right panel first 10 minutes), which is evidenced by the low sociality scores  
115 occurring at those times. This indicates that the sociality scores in our set-  
116 ups showed great variability and the lack of a strong correlation between  
117 sociality scores and fight scores could not be attributed to the fact that  
118 sociality scores do not vary in our experiments. Therefore our classifier is  
119 able to successfully tell apart aggression from other types of social and non-  
120 social behaviors.

### 121 1.2.3 Description of fight types

122 Not all fights followed the progression from pre-fight to symmetric to asym-  
123 metric (resolution) phase. In some cases, the symmetric phase was not fol-  
124 lowed by an asymmetric phase and in others, an asymmetric phase both  
125 preceded and followed the symmetric phase. Interestingly, the individual  
126 who was dominant before the symmetric phase was not necessarily the one  
127 who attacked after the symmetric phase (see **Figure S2** for examples plots  
128 of fights in the more rare cases). In 12 of 34 fights, the only phase present  
129 was the asymmetric one.

130 **1.3 Supplementary figures**

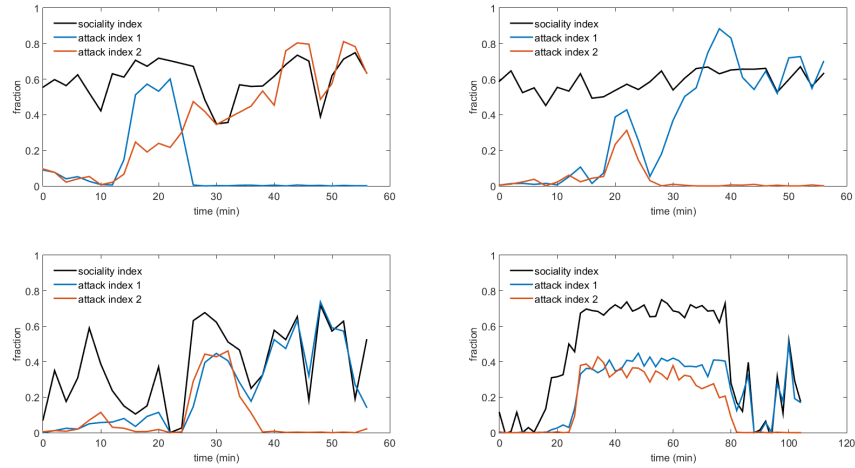

Figure S1: **The classifier selectively targets aggressive episodes.** We plot the sociality index (black trace) and the individual attack fractions of both animals (red and blue traces) for four different fights. As can be seen from the plots, the sociality index is a distinct measure which does not always correlate with the attack fraction (see for example the first 10 minutes in the top panels, where sociality is high but attack fraction stays low).

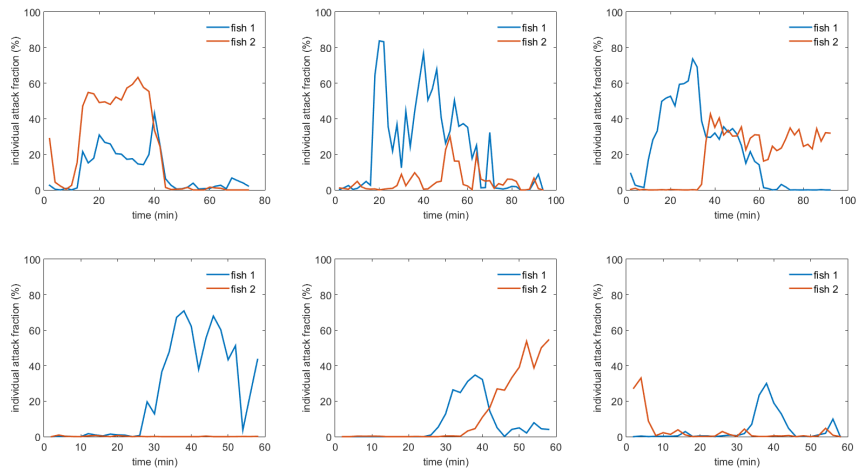

Figure S2: **An illustration of variability in fight dynamics.** A plot of the time series of attack rates for 6 different fights. Top left: a fight with a symmetric phase that ends without an asymmetric phase. Top middle: One animal predominantly attacks but the attack rate is irregular. Note the short duration symmetric phase around the 50 minute mark. Top right: A fight where the symmetric phase is both preceded and followed by an asymmetric phase. The animal who dominates in the beginning is not the eventual winner. Bottom left: a fight with only an asymmetric phase and one animal dominant. Bottom middle: a fight without a symmetric phase where the dominant individual switches in the middle of the fight without a symmetric phase. Bottom right: a fight with irregular and sporadic asymmetric attacks on both sides.

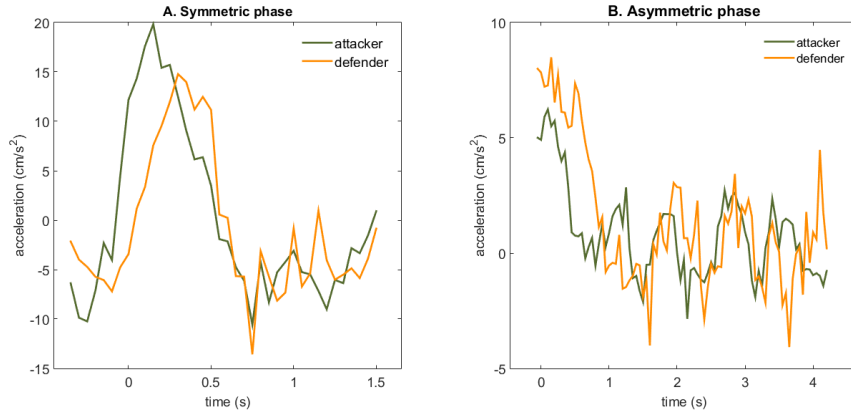

Figure S3: **Phase-typical acceleration waveforms.** A. The average acceleration of the attacker and the defender during an attack for the symmetric phase of the conflict (acceleration was obtained by numerically differentiating a velocity signal which was low-pass filtered by a moving average filter with kernel length 0.25 seconds). B. Same as A but for the asymmetric phase of the conflict

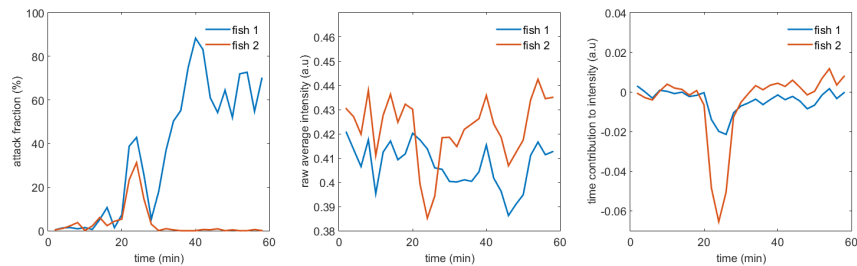

Figure S4: **Measuring changes in color.** Left panel: attack rates for the two animals over the course of the fight. Middle panel: raw average intensity of each animal over the course of the fight, the confounding influence of spatial variation in illumination has not been removed. Right panel: the change of intensity of both animals over time with confounding effects of spatial illumination inhomogeneity removed (see supplementary methods). The plots reveal a transient darkening which occurs in both animals during the fight. Notice the larger change in intensity in the eventual loser.

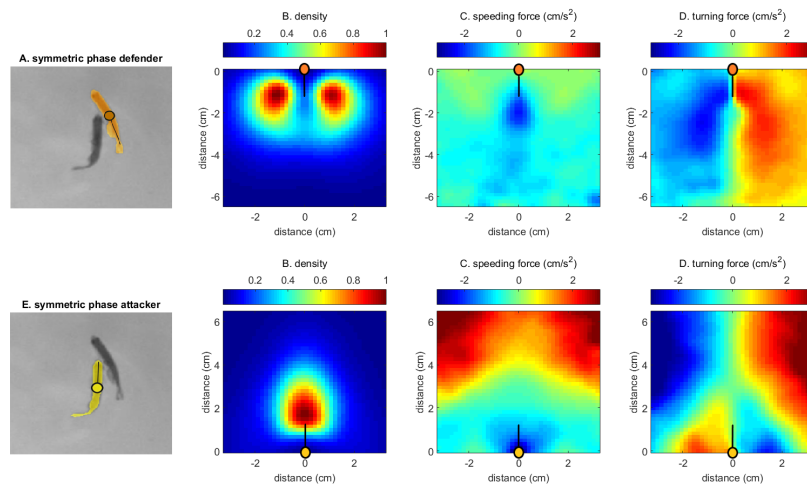

Figure S5: **Forcemaps of the symmetric phase with periods of collision removed.** Same maps as shown in main paper Figure 3 and 4 top row panels. They differ from how the maps in the main paper were calculated by the fact that we have removed the periods where the two animals were physically colliding. Top panels: Maps of the defender during the symmetric phase of the fight. Bottom panels: Maps of the attacker during the symmetric phase of the fight.



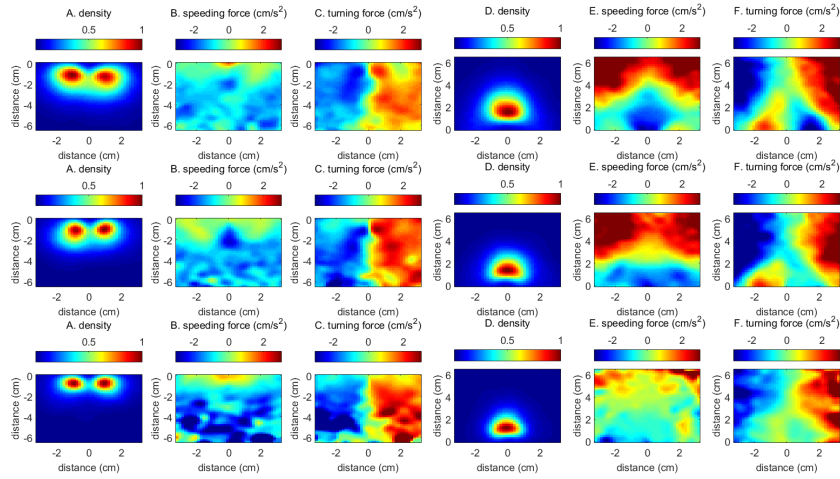

Figure S6: **Example symmetric phase force maps calculated based on single fights.** Each row depicts symmetric phase defender (A-C) and attacker (D-E) force maps for a different fight. A: defender location map B: defender speeding map C: defender turning map D: attacker location map E: attacker speeding map F: attacker turning map

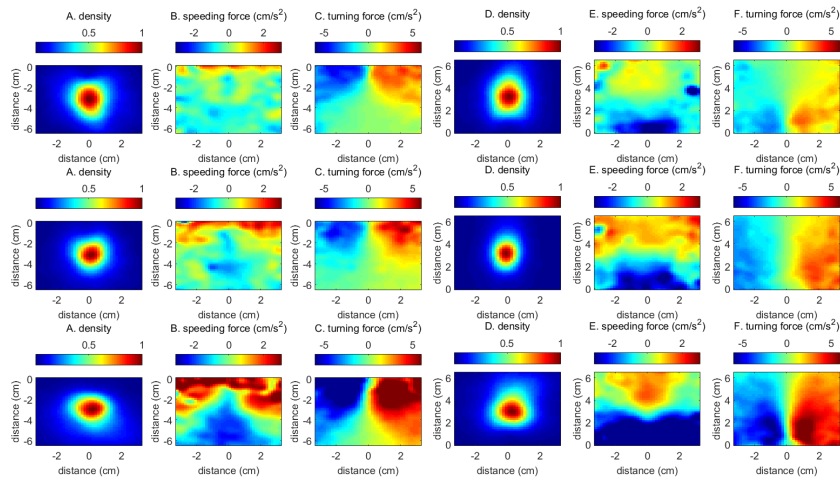

Figure S7: **Example asymmetric phase force maps calculated based on single fights.** Each row depicts asymmetric phase defender (A-C) and attacker (D-E) force maps for a different fight. A: defender location map B: defender speeding map C: defender turning map D: attacker location map E: attacker speeding map F: attacker turning map

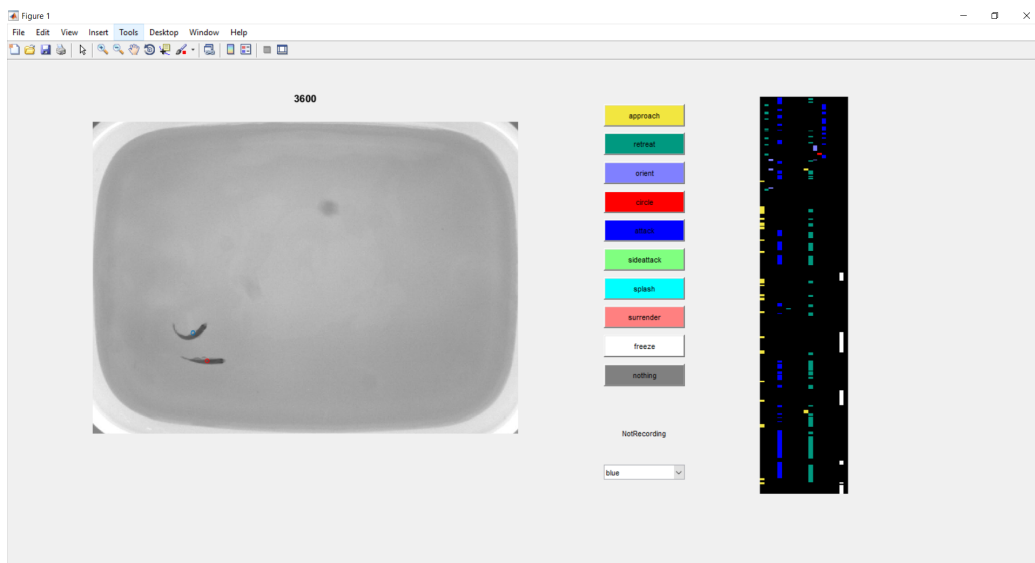

Figure S8: **An example frame of the GUI used to annotate videos.** The left panel shows a scrollable feed of the video which is used to examine the video frame by frame with controllable gain of scrolling. The middle panel displays a set of buttons to annotate behaviors and a menu to choose the focal animal. The right panel shows an ethogram which is dynamically updated as the investigator adds new annotations.
